# Supplementary material for: Consequences of SARS-CoV-2 pandemic on urological surgery in France: a nationwide analysis of the healthcare system database
Source: HighWire-hosted journal article supplement (doi:10.1136/bmjopen-2022-066220), 2022-11-01
Supplement: bmjopen-2022-066220supp001_data_supplement.pdf [file bmjopen-2022-066220supp001_data_supplement.pdf]

**Supplementary table : List of the International Classification of Diseases (ICD-10) codes of the different urological surgeries analyzed in this study.**

| <b>Surgeries</b>                                            | <b>ICD-10 codes</b> |
|-------------------------------------------------------------|---------------------|
| Prostate cancer (radical prostatectomy)                     | C61                 |
| Kidney cancer (partial and radical nephrectomy)             | C64                 |
| Bladder cancer (trans-ureteral resection)                   | C67                 |
| Bladder cancer (radical cystectomy)                         | C67                 |
| Benign prostatic hyperplasia (all kinds of surgeries)       | D291/N40            |
| Female urinary incontinence (sub-urethral slings)           | N393/N394/R32       |
| Calculus of kidney (endoscopic and percutaneous procedures) | N200                |
